# Supplementary material for: Evaluation of seven commercial SARS-CoV-2 RNA detection kits based on real-time polymerase chain reaction (PCR) in China
Source: publisher site journal article supplement (doi:10.1515/cclm-2020-0271), 2020-07-13
Supplement: Supplementary file 1 [file j_cclm-2020-0271_suppl.docx]

**Supplementary Table 1:** Diagnostic criteria of Coronavirus Disease 2019 (COVID-19) issued by the Chinese Health Commission (seventh trial version).

| **Diagnostic criteria** |
| --- |
| **1. Epidemiological history**  One or more of the following exposures during the 14 days before the onset of symptoms  1)Travel or residence history in Wuhan and surrounding areas, or the local community with confirmed COVID-19 patient.  2)Close contact* with cases with laboratory-confirmed COVID-19 (positive for the nucleic acid test).  3)Close contact* with people from Wuhan or surrounding areas or local communities with fever or respiratory symptoms case reports.  4) Cluster onset.  **2. Clinical manifestation**  1)fever and(or) respiratory symptoms.  2)Imaging features of viral pneumonia.  3)Normal or low white blood cell count or reduced lymphocyte in the early stage of onset.  **Patients with exposure history should meet any two of the clinical manifestations. Patients without an exposure history should meet all three conditions.**  **Confirmed case**  Suspected cases have at least one of the following pathogenic or serological evidence:  1)Positive real-time PCR of the patient’s specimens for SARS-CoV-2 nucleic acid.  2)Viral gene sequences are highly homologous to SARS-CoV-2.  3)Serum SARS-CoV-2 specific IgM and IgG antibody were positive; serum SARS-CoV-2 specific IgG antibody changed from negative to positive or recover phase IgG antibody was four times higher than that of the acute phase. |

*Close contact is defined as healthcare-related exposures, including direct care for patients with confirmed COVID-19, collaboration with healthcare workers with confirmed COVID-19, visiting or staying in the same closed environment with patients with confirmed COVID-19, or members who live in the same family environment with patients with confirmed COVID-19.

**Supplementary Table 2:** Laboratory testing guidelines of Coronavirus Disease 2019 (COVID-19) issued by the Chinese Health Commission (fifth version).

| **Laboratory detection of SARS-CoV-2** |
| --- |
| RT-PCR routinely detects the SARS-CoV-2 infection. Any SARS-CoV-2 detection must be performed in qualified laboratories by personnel trained by related technical safety. The SARS-CoV-2 detection methods in this guideline are mainly directed against the ORF1ab and N gene of the SARS-CoV-2 genome.  Laboratory confirmation of a positive case requires one of the following two conditions:  1. The RT-PCR results of SARS-CoV-2 two targets (ORF1ab and N) were positive in the same specimen. If there is a single target positive test result, it needs to be resampled and retested. If it is still a single target positive, it is determined to be positive.  2. If two kinds of real-time fluorescent RT-PCR samples show a single target positive at the same time, or the same type of samples show a single target positive in two sampling tests, it can be determined as positive. |

**Supplementary Table 3:** Evaluation of clinical sensitivity of seven kits in three groups.

| Kits | Groups | % Sensitivity | p-Value |
| --- | --- | --- | --- |
| Kit A | Ⅰ | 90.48(38/42) | >0.05 |
| Kit B | Ⅰ | 92.86(39/42) |
| Kit C | Ⅰ | 83.33(35/42) |
| Kit D | Ⅱ | 97.62(41/42) | <0.05 |
| Kit E | Ⅱ | 78.57(33/42) |
| Kit F | Ⅲ | 90.48(38/42) | <0.05 |
| Kit G | Ⅲ | 76.19(32/42) |

**Supplementary Table 4:** Comparison of detection capabilities in different kits for diverse target genes.

| Kits | % OR1ab gene detection rate# | % N gene detection rate# | % E gene detection rate# |
| --- | --- | --- | --- |
| Kit A | 90.48(38/42) | NA | NA |
| Kit B | 92.86(39/42) a | | NA |
| Kit C | 23.81(10/42) | 80.95(34/42) | NA |
| Kit D | 92.86(39/42) | 90.48(38/42) | NA |
| Kit E | 78.57(33/42) | 57.14(24/42) | NA |
| Kit F | 80.95(34/42) | 90.48(38/42) | 66.67(28/42) |
| Kit G | 30.95(13/42) | 78.57(33/42) | 85.71(36/42) |

NA, not applicable; Value in parentheses represents the number of positives/total number of true positives; #The positive detection rate of each gene is calculated according to the positive cut off value provided by the kit instructions; a The kit B used only one fluorescent channel (FAM) to detect two target genes simultaneously.
